# Supplementary material for: Regulation of CCL2 expression in human vascular endothelial cells by a neighboring divergently transcribed long noncoding RNA
Source: PubMed Central journal article supplement — Proc Natl Acad Sci U S A. 2019 Jul 26;116(33):16410–9. doi: 10.1073/pnas.1904108116 (PMC6697820; doi:10.1073/pnas.1904108116), 2019-07-26
Supplement: pnas.1904108116.sapp.pdf [file pnas.1904108116.sapp.pdf]

## Supplementary Information for

### **Regulation of *CCL2* expression in human vascular endothelial cells by a neighboring divergently transcribed long noncoding RNA.**

Nadiya Khyzha<sup>1-3</sup>, Melvin Khor<sup>1-3</sup>, Peter DiStefano<sup>1-3</sup>, Liangxi Wang<sup>4,5</sup>, Ljubica Matic<sup>6</sup>, Ulf Hedin<sup>6</sup>, Michael D. Wilson<sup>4,5</sup>, Lars Maegdefessel<sup>6,7</sup>, Jason E. Fish<sup>1-3</sup>

Jason E. Fish

jason.fish@utoronto.ca

#### **This PDF file includes:**

Supplemental Methods

Captions for figures

Figures S1 to S13

Tables S1 to S5

References for SI reference citations

#### **Other supplementary materials for this manuscript include the following:**

Datasets S1 to S7

## **Supplemental Methods**

### **Nuclear Cytoplasmic Fractionation:**

HMEC cell pellets ( $3 \times 10^6$  cells) were collected and washed twice in ice cold PBS (-/-). The final PBS wash was performed in 1 mL of PBS at 800g for 5 min. Cells were lysed for 5 minutes on ice in the lysis solution (50 mM Tris-HCl, pH 8.0; 140 mM NaCl; 1.5 mM MgCl<sub>2</sub>, 0.5% Nonidet P-40; 0.2 units/  $\mu$ l RNaseOUT; 1mM dithiothreitol (DTT)). Nuclei were pelleted by spinning at 300g for 2 min. The supernatant cytoplasmic fraction was removed and the nuclear pellet was washed in 500  $\mu$ l of PBS for 5 min at 300g. TRIzol Reagent (Thermo Fisher Scientific) was then added to the cytoplasmic and nuclear fractions. RNA was isolated and equal volumes of RNA from each fraction were used to make cDNA.

### **Chromatin Immunoprecipitation followed by sequencing (ChIP-seq) analysis:**

ChIP-seq analysis was performed on previously published data (GSE89970) (1) ("SI Appendix, Table S6"). The quality of reads was analyzed using FASTQC (2) and the Illumina adapter sequences along with low quality base pairs (Phred <20) were trimmed off using Trim Galore!. The reads were then aligned to hg19 with Bowtie2 using the sensitive end-to-end pre-set option (-D 15 -R 2 -L 22 -I S,1,1.5) (3). Alignment quality was then assessed as per ENCODE guideline metrics using the "qualityScores\_EM" and "getCrossCorrelationScores" functions from the "ChIC" Bioconductor package ("SI Appendix, Table S6"). Afterwards, peaks were called using MACS2 (3, 4). BAM files from replicate experiments were merged into one BAM file using BamTools (5). Profile plots were generated using ComputeMatrix (DeepTools2) and PlotProfile (DeepTools2) (6) over the given genomic coordinates that corresponded to the coordinates

between the mRNA-lncRNA pairs. For visualization, bamCoverage (DeepTools2)(6) was used to normalize reads based on RPKM and to generate BigWig files.

### **Mass Spectrometry Analysis:**

Mass spectrometry and all sample preparation was performed by SPARC Molecular Analysis, The Hospital for Sick Children, Toronto, Canada. Samples were resuspended in 50  $\mu$ L of 50 mM  $\text{NH}_4\text{HCO}_3$  (pH=8.3), and DTT was added to reduce cysteines at a final concentration of 10 mM. Cysteines were reduced at 60°C for 1 hour. Samples were cooled to room temperature and iodoacetamide was added to a final volume of 20 mM. Samples were incubated at room temperature in the dark for 30 minutes. Iodoacetamide was then inactivated by adding DTT to a final concentration of 40 mM. TPCK-treated trypsin (Promega), was added to a final protease:protein ration of 1:50-1:100 and samples were digested overnight at 37°C. Magnetic beads were removed, samples were lyophilized, resuspended in 1% TFA and the free digests were combined. Peptides were purified by homemade C18 tips, and then lyophilized.

Samples were analyzed on a Thermo Scientific Orbitrap Fusion-Lumos Tribrid Mass Spectrometer (ThermoFisher, San Jose, CA) outfitted with a nanospray source and EASY-nLC 1200 nano-LC system (ThermoFisher, San Jose, CA) and equipped with ETD mode. Lyophilized peptide mixtures were dissolved in 0.1% formic acid and loaded onto a 75  $\mu$ m x 50 cm PepMax RSLC EASY-Spray column filled with 2  $\mu$ M C18 beads (ThermoFisher San, Jose CA) at a pressure of 900 Bar and a temperature of 60°C. Peptides were eluted over 60 minutes at a rate of 250 nL/min using a gradient set up as follows, where Buffer A is 0.1% Formic acid and Buffer B is 80% Acetonitrile, 0.1% Formic Acid, all v/v in HPLC grade water.

| Time | Duration | % B |
|------|----------|-----|
| 0    | 0        | 0   |
| 48   | 48       | 42  |
| 50   | 2        | 100 |
| 60   | 2        | 100 |

Data was acquired using the FT-FT method. MS1 acquisition was performed with a scan range of 400 m/z - 1600 m/z with resolution set to 120 000, maximum injection time of 120 ms and AGC target set to 4e5. Isolation for MS2 scans was performed in the quadrupole, with an isolation window of 1.6. MS2 scans were done in the orbitrap with a maximum injection time of 100 ms and an AGC target of 5e5. Ions were selected for HCD fragmentation at with a collision energy of 30. The dynamic exclusion was applied using a maximum exclusion list of 500 with one an exclusion duration of 8 s.

### **RNA Immunoprecipitation (RIP):**

RNA Immunoprecipitation was performed as previously described (7). The pull-downs were performed on nuclear extracts from IL-1 $\beta$  stimulated HMEC-1 cells ( $5 \times 10^6$  cells per condition). Antibodies used for pull-down included RELA (Cell Signalling 8242S, 5  $\mu$ g), p300 (Santa Cruz, sc-585, 5  $\mu$ g), BRD4 (Bethyl Laboratories, A301-985A50, 5  $\mu$ g), CHD4 (Abcam, ab70467, 5  $\mu$ g), HNRNPU (Santa Cruz, sc-32315, 5  $\mu$ g), and IGF2BP2 (Proteintech, 11601-1-AP, 5  $\mu$ g). As control mouse IgG (Santa Cruz, sc-2025, 5  $\mu$ g) or rabbit IgG (Santa Cruz, sc-2027, 5  $\mu$ g) were used.

### **Western Blotting:**

Western Blotting was performed using the following primary antibodies: HNRNPU (Santa Cruz, sc-32315, 1:200) and IGF2BP2 (Proteintech, 11601-1-AP, 1:2000). The secondary antibodies used were anti-mouse IgG HRP conjugated (Cell Signalling, 7076S, 1:3000) and anti-rabbit IgG HRP conjugated (Cell Signalling, 7074S, 1:3000). Protein bands were visualized using the SuperSignal West Pico Plus Chemiluminescent Substrate (Thermo Scientific) using GelCapture Chemi (FroggaBio, MicroChemi 4.2). Silver staining was performed using the Pierce Silver Stain Kit (Thermo Scientific) as per manufacturer's instructions.

### **Human material analyses:**

Patients undergoing surgery for high-grade (>50% North American Symptomatic Carotid Endarterectomy Trial, NASCET) (8) carotid stenosis at the Department of Vascular Surgery, Karolinska University Hospital, Stockholm, Sweden were consecutively enrolled in the study and clinical data recorded on admission. Carotid endarterectomies (carotid plaques) were collected at surgery and retained within the **Biobank of Karolinska Endarterectomies (BiKE)**. The BiKE study cohort demographics, details of sample collection, processing and large-scale analyses (transcriptomic profiling) were as previously described in detail (9). Normal artery controls were nine macroscopically disease-free iliac arteries and one aorta, obtained from organ donors without history of cardiovascular disease. All human samples were collected with informed consent from patients; all studies were approved by the regional Ethical Committee and follow the guidelines of the Declaration of Helsinki.

Microarray dataset analyses were performed with GraphPad Prism 6 and Bioconductor software using a linear regression model adjusted for age and gender or a two-sided Student's t-

test assuming non-equal deviation, with correction for multiple comparisons according to Bonferroni, as previously described (8). In all analyses  $p < 0.05$  was considered to indicate statistical significance. The microarray dataset is available from Gene Expression Omnibus (GSE21545).

### **RNA in situ hybridization:**

For in situ hybridization (ISH), we used a Qiagen miRCURY LNA DIG-labeled probe (5'-3' sequence: /5DigN/ATATTACTTTCCAATCAACTCA/3Dig\_N/) with the accompanying kit and protocol (Qiagen, Venlo, The Netherlands). In brief, tissue sections were deparaffinized (formalin-fixed paraffin embedded) and rehydrated. Nucleases were inactivated with proteinase K followed by a 2 hr hybridization at hybridization temperature (64°C). Slides were washed in saline sodium citrate buffers with subsequent DIG detection methods. Nuclear counterstaining was performed with Nuclear Fast Red (Sigma Aldrich).

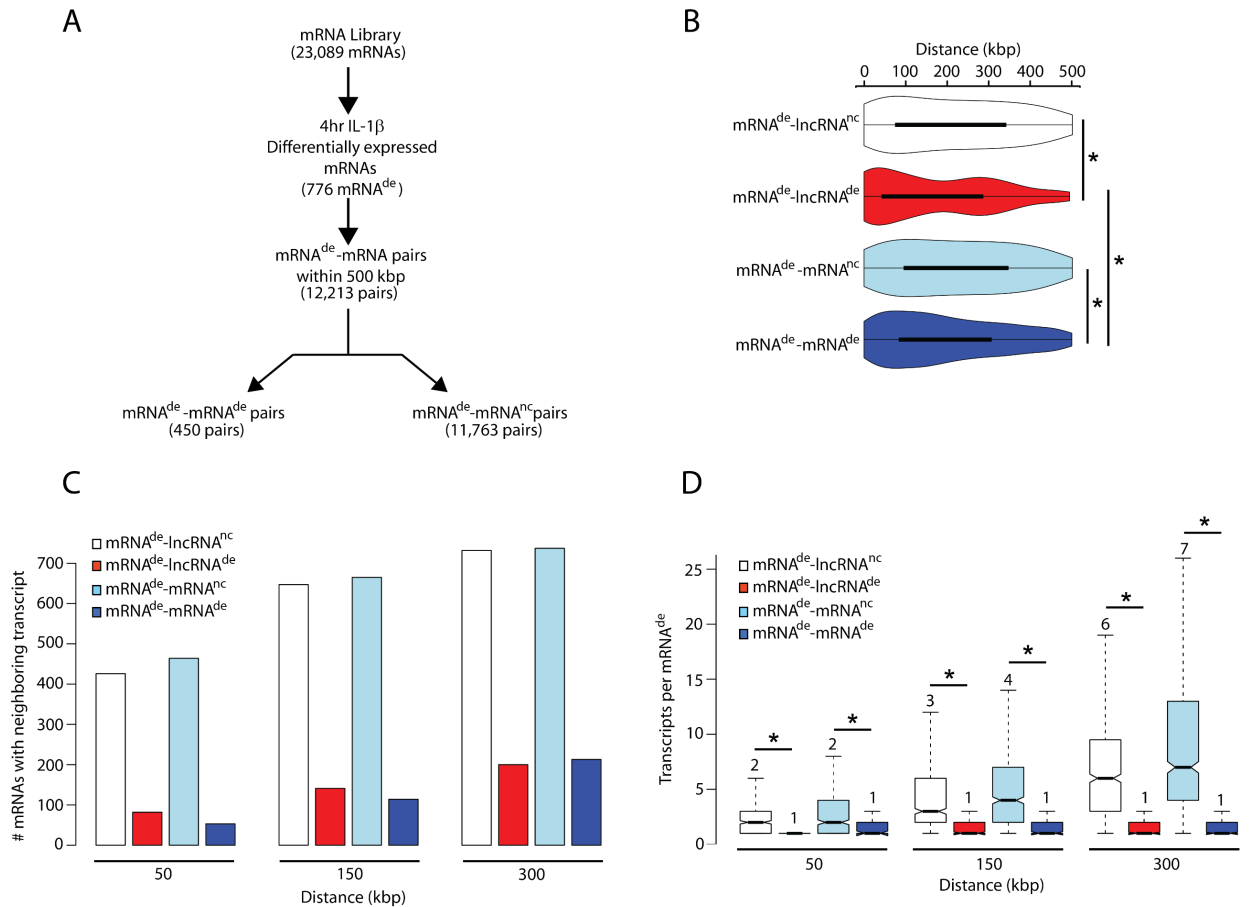

**Supplementary Figure 1. Identification of IL-1 $\beta$  regulated mRNA-mRNA and mRNA-lncRNA neighboring pairs.** A) Schematic of the computational pipeline used to identify neighboring mRNA-mRNA pairs, where the mRNAs are either IL-1 $\beta$  regulated (mRNA<sup>de</sup>) or not (mRNA<sup>nc</sup>). de = differentially expressed, nc = no change. B) Violin plots illustrating the distribution of genomic distance between transcript pairs. \*p<0.02, Wilcoxon unpaired rank-sum test with Bonferroni correction. C) Bar graph showing the number of mRNA<sup>de</sup> that have a neighboring mRNA<sup>de</sup>, mRNA<sup>nc</sup>, lncRNA<sup>de</sup> or lncRNA<sup>nc</sup> transcript within the specified genomic distance. D) Box plots showing the number of neighboring lncRNA<sup>nc</sup>, lncRNA<sup>de</sup>, mRNA<sup>nc</sup>, and mRNA<sup>de</sup> per neighboring mRNA<sup>de</sup> that are within 50, 150, and 300 kbp. \*p<0.05, Student's t-test with Bonferroni correction.

**A**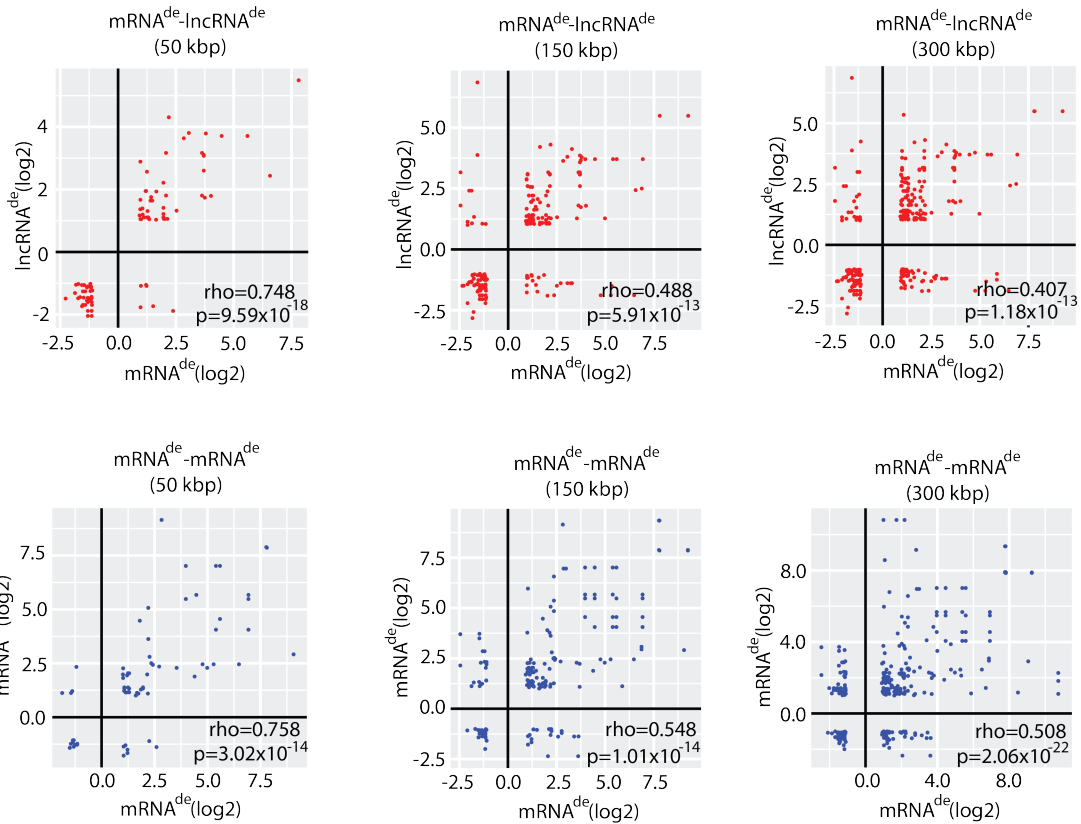**B**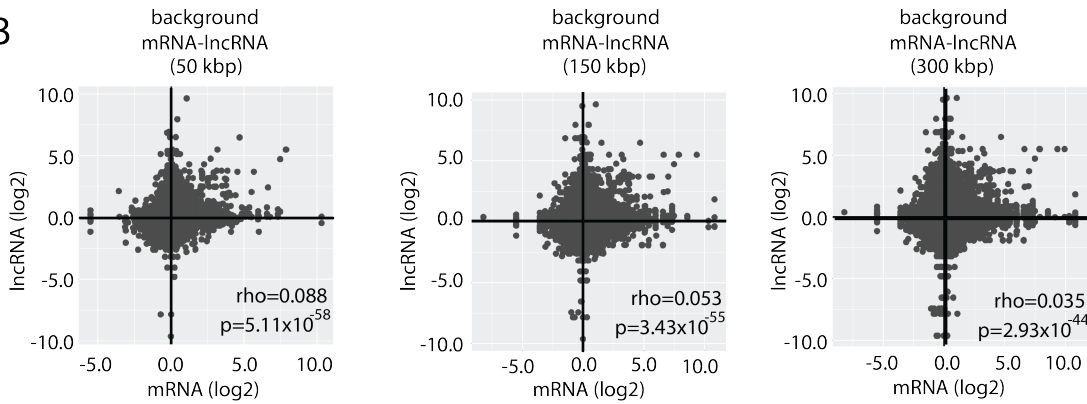**C**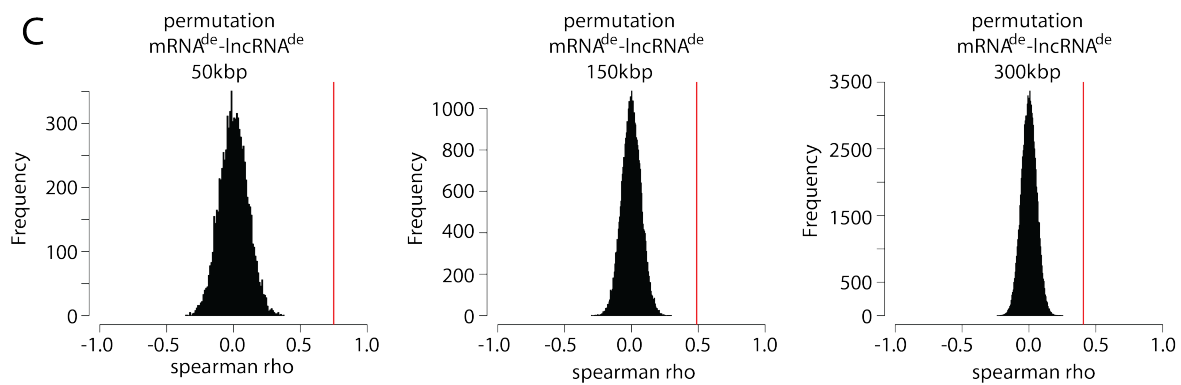



**Supplementary Figure 2. Correlation in expression of mRNA<sup>de</sup>-lncRNA<sup>de</sup> and mRNA<sup>de</sup>-mRNA<sup>de</sup> neighboring pairs.** A) Scatterplots showing the log2 fold changes of mRNA<sup>de</sup> on the x-axis and the log2 fold changes of their neighboring lncRNA<sup>de</sup> (top) or mRNA<sup>de</sup> (bottom) on the y-axis. Spearman rho correlation coefficient and its associated p-values are indicated. B) Scatterplots showing the log2 fold changes of all mRNAs on the x-axis and the log2 fold changes of all lncRNAs on the y-axis for a given genomic distance. Spearman rho correlation coefficients and their associated p-values are indicated. C) Histograms showing the distribution of spearman rho values calculated from randomized mRNA<sup>de</sup>-lncRNA<sup>de</sup> pairs that are not neighboring each other. The vertical red line represents the spearman rho value calculated from the neighboring mRNA<sup>de</sup>-lncRNA<sup>de</sup> data set.

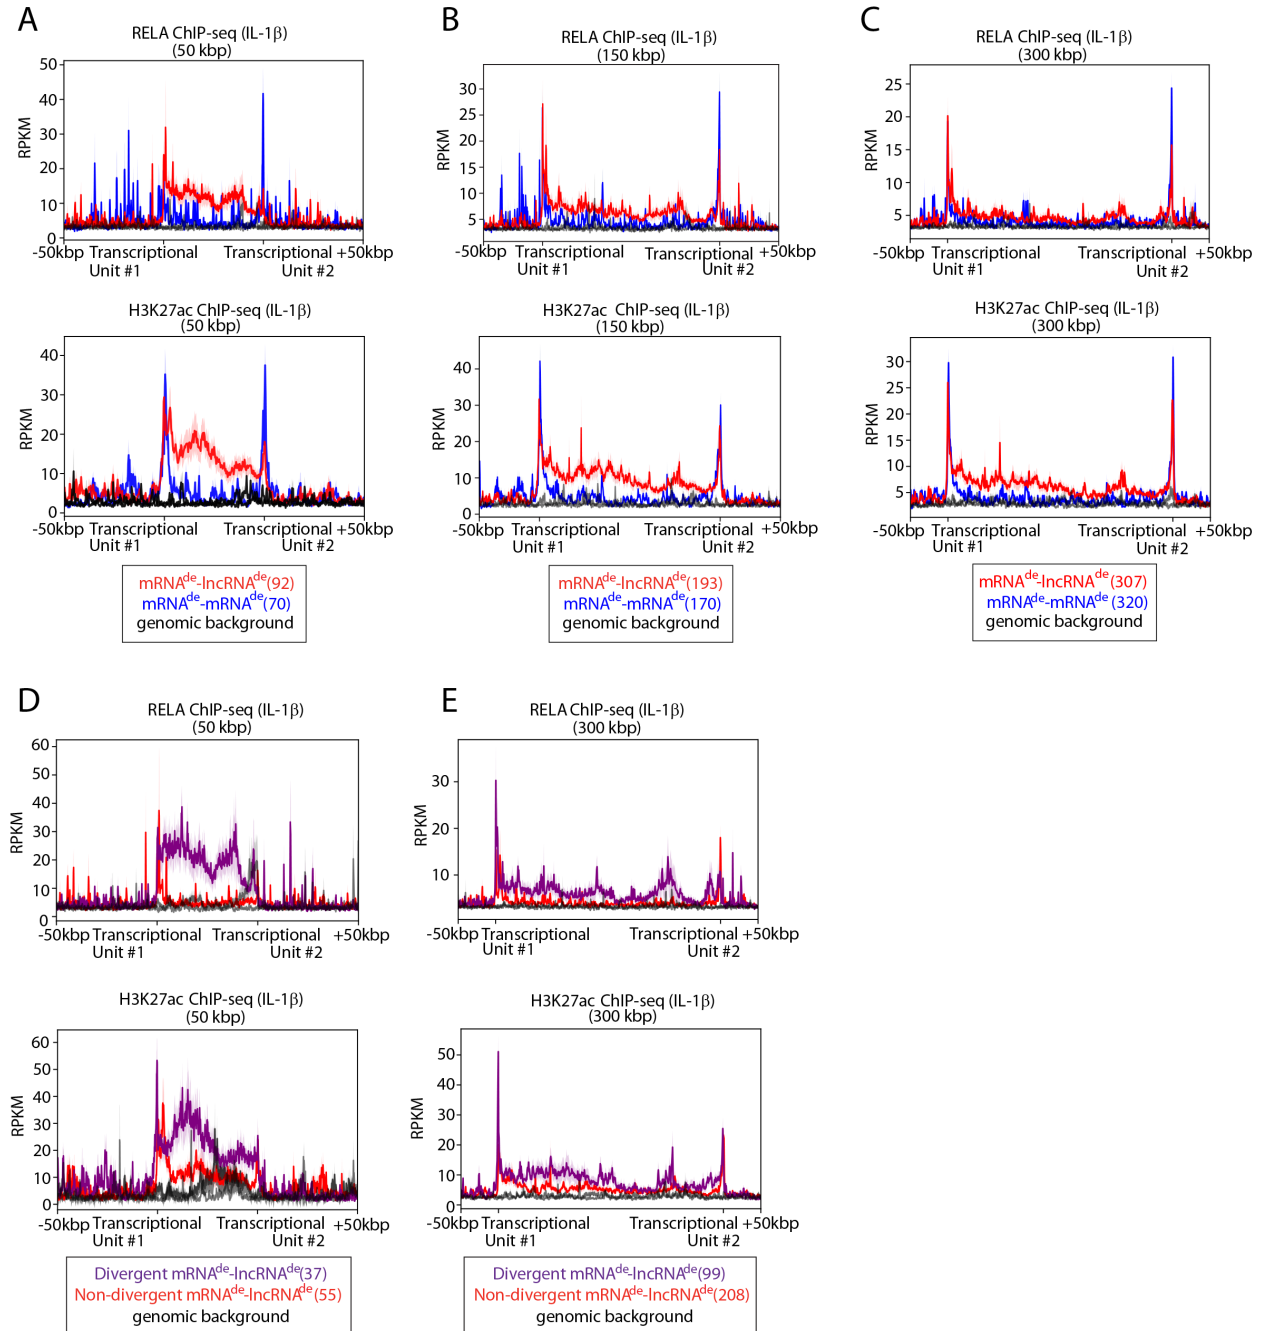

**Supplementary Figure 3. Divergent mRNA<sup>de</sup>-lncRNA<sup>de</sup> pairs have shared regulatory elements.** A-C) Profile plot of RELA and H3K27ac ChIP-seq signals in IL-1 $\beta$  treated cells for the region between the transcriptional start site (TSS) of an mRNA<sup>de</sup> and the TSS of its neighboring lncRNA<sup>de</sup> or mRNA<sup>de</sup> transcript. Shown are neighboring pairs within 50 kbp (A), 150 kbp (B) or

300 kbp (C) of each other. The number of transcripts in each category is indicated in brackets. D-  
E) Profile plot of RELA and H3K27ac ChIP-seq signals in IL-1 $\beta$  treated cells for regions between  
the TSS of mRNA<sup>de</sup>-lncRNA<sup>de</sup> pairs that either are or are not divergently transcribed. Shown are  
neighboring pairs within 50 kbp (D) or 300 kbp (E) of each other. The number of transcripts in  
each category is indicated in brackets.

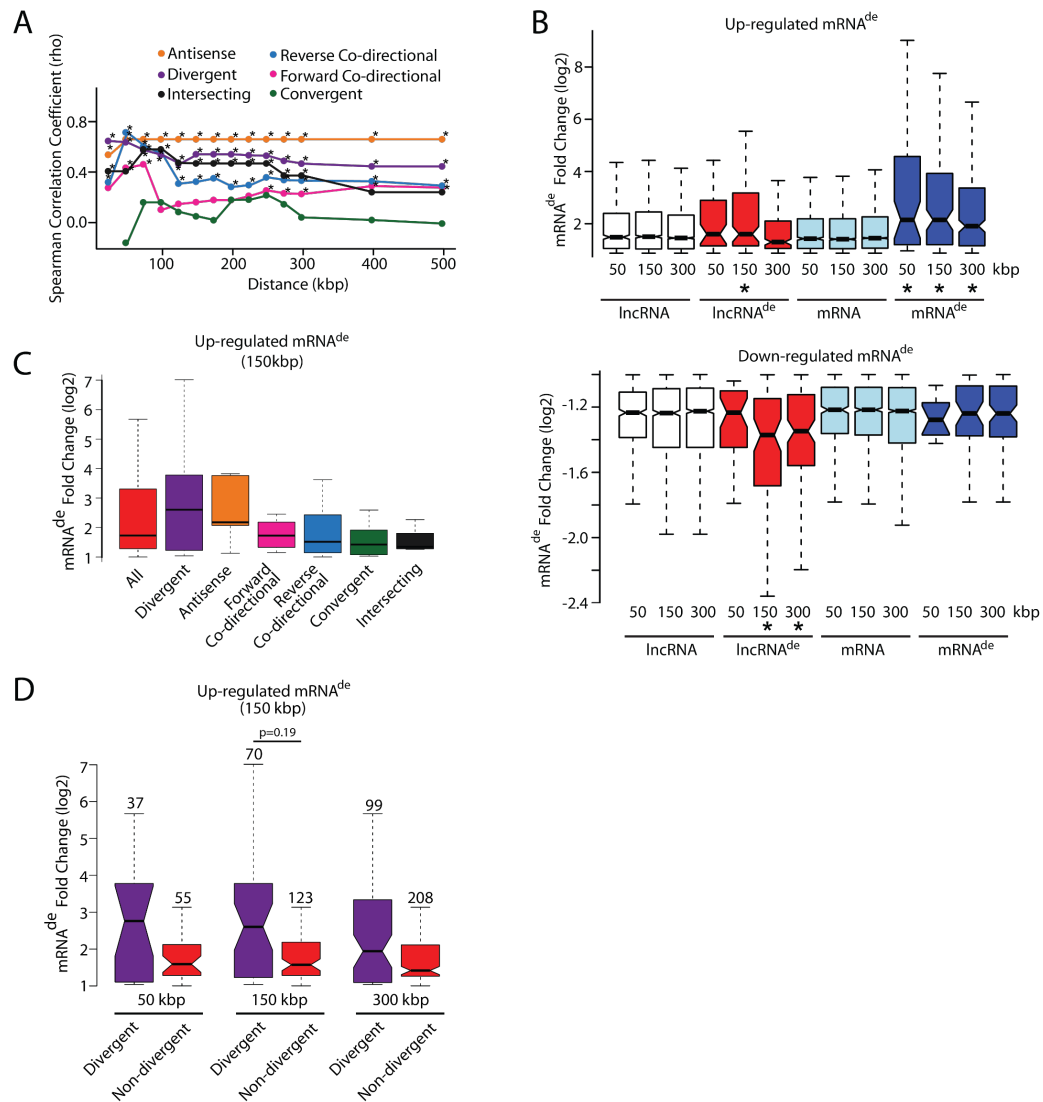

**Supplementary Figure 4. Divergent and antisense mRNA<sup>de</sup>-IncRNA<sup>de</sup> pairs tend to have higher correlation and mRNA<sup>de</sup> up-regulation than those transcribed in other orientations.**

A) Spearman rho correlation coefficient for mRNA<sup>de</sup>-IncRNA<sup>de</sup> pairs depending on type of transcriptional orientation. \*p<0.05, significance associated with each spearman's rho correlation coefficient. B) Box plots displaying the log2 fold change of up-regulated or down-regulated mRNA<sup>de</sup> that have a neighboring mRNA<sup>nc</sup>, mRNA<sup>de</sup>, IncRNA<sup>nc</sup> or IncRNA<sup>de</sup>. \*p<0.05, Wilcoxon unpaired rank-sum test with Bonferroni correction, IncRNA<sup>nc</sup> vs IncRNA<sup>de</sup> or mRNA<sup>nc</sup> vs

mRNA<sup>de</sup>. C) Box plots displaying the log<sub>2</sub> fold change of up-regulated mRNA<sup>de</sup> depending on its transcriptional orientation to its neighboring lncRNA<sup>de</sup>. D) Box plots displaying the log<sub>2</sub> fold change of up-regulated mRNA<sup>de</sup> based on whether it is neighboring a divergent or non-divergent lncRNA<sup>de</sup>. The number of observations in each group are shown above each boxplot. Wilcoxon unpaired rank-sum test with Bonferroni correction.

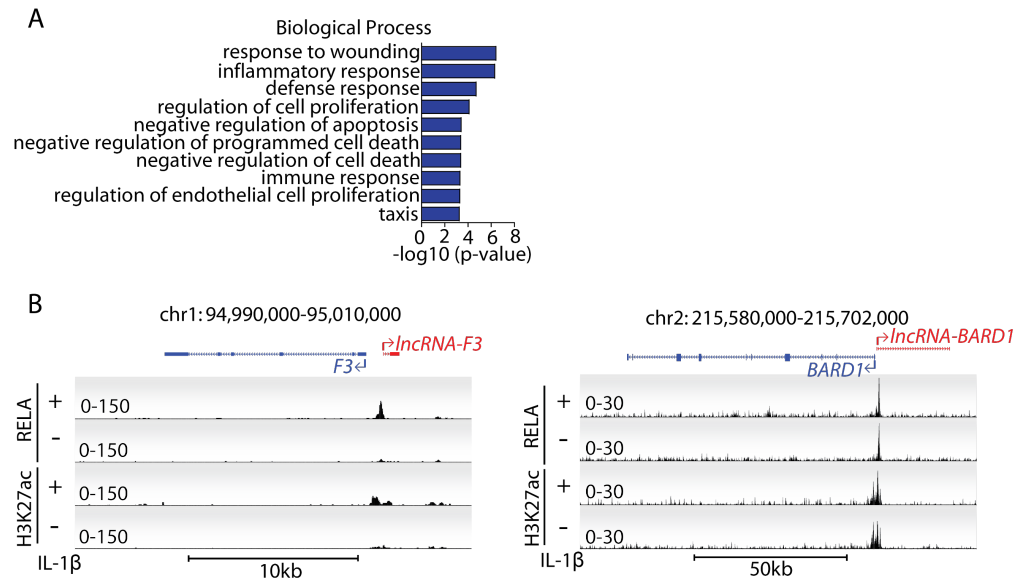

**Supplementary Figure 5. Identification and characterization of divergent mRNA<sup>de</sup>-**

**lncRNA<sup>de</sup> pairs.** A) GO terms associated with the mRNAs from the indicated divergent mRNA<sup>de</sup>-

lncRNA<sup>de</sup> pairs. B) UCSC genome browser tracks depicting *lncRNA-F3* and *lncRNA-BARD1*

ChIP-seq tracks are shown for RELA and H3K27ac under either basal conditions or upon IL-1 $\beta$  treatment.

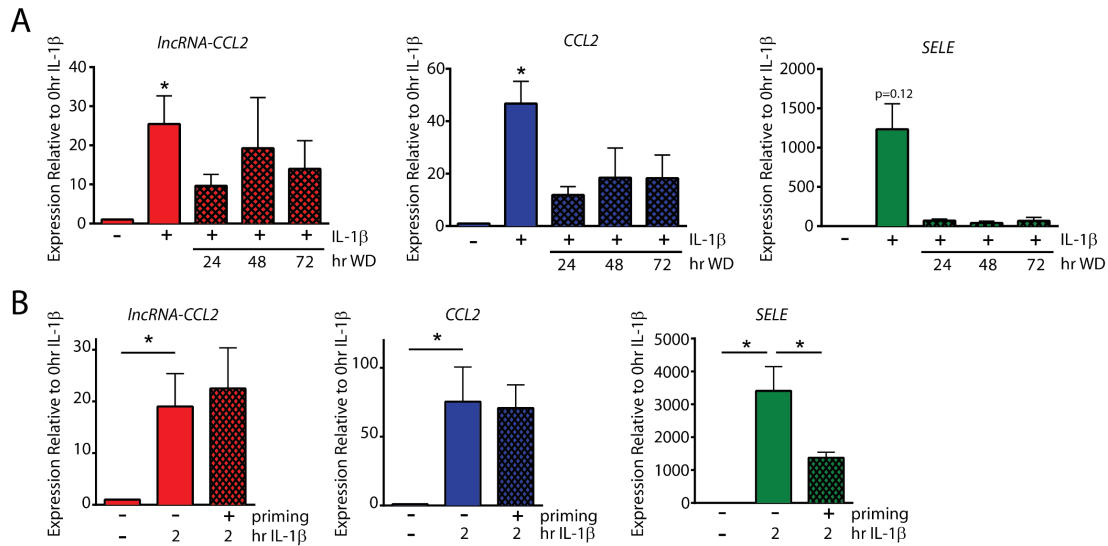

**Supplementary Figure 6. *CCL2* and *lncRNA-CCL2* show coordinated expression in response to withdrawal and re-stimulation with IL-1 $\beta$ .** A) qRT-PCR data showing expression kinetics of *lncRNA-CCL2*, *CCL2*, and *SELE* in HUVEC that were stimulated with IL-1 $\beta$  for 24 hours, followed by withdrawal of IL-1 $\beta$  for 24-72 hours. \* $p < 0.05$ , Friedman test with Dunn's multiple comparisons test, relative to basal,  $n = 4$ . B) qRT-PCR data showing expression of *lncRNA-CCL2*, *CCL2*, and *SELE* in HUVECs that were stimulated with IL-1 $\beta$  for 24 hours, followed by withdrawal of IL-1 $\beta$  for 24 hours and then re-stimulation with IL-1 $\beta$  for 2 hours. \* $p < 0.05$ , paired student t-test,  $n = 7-9$ .

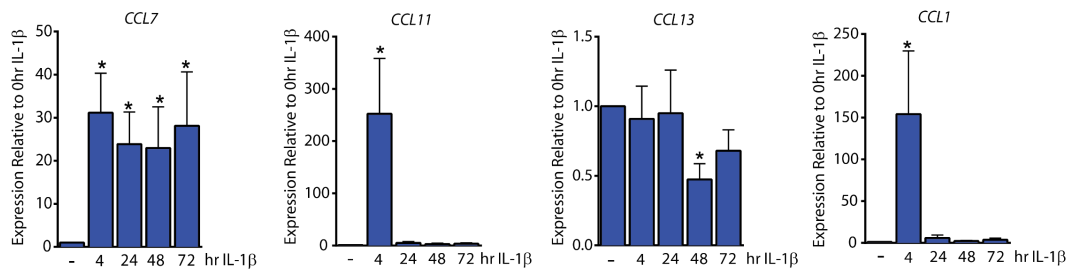

**Supplementary Figure 7. Other *CCL* loci genes do not show coordinated IL-1 $\beta$  mediated expression with *lncRNA-CCL2*.** qRT-PCR data showing the expression of *CCL7*, *CCL11*, *CCL8*, *CCL13*, and *CCL1* upon 4 to 72-hour treatment with IL-1 $\beta$ . \* $p < 0.05$ , Friedman test with Dunn's multiple comparisons test, relative to basal,  $n=6$ .



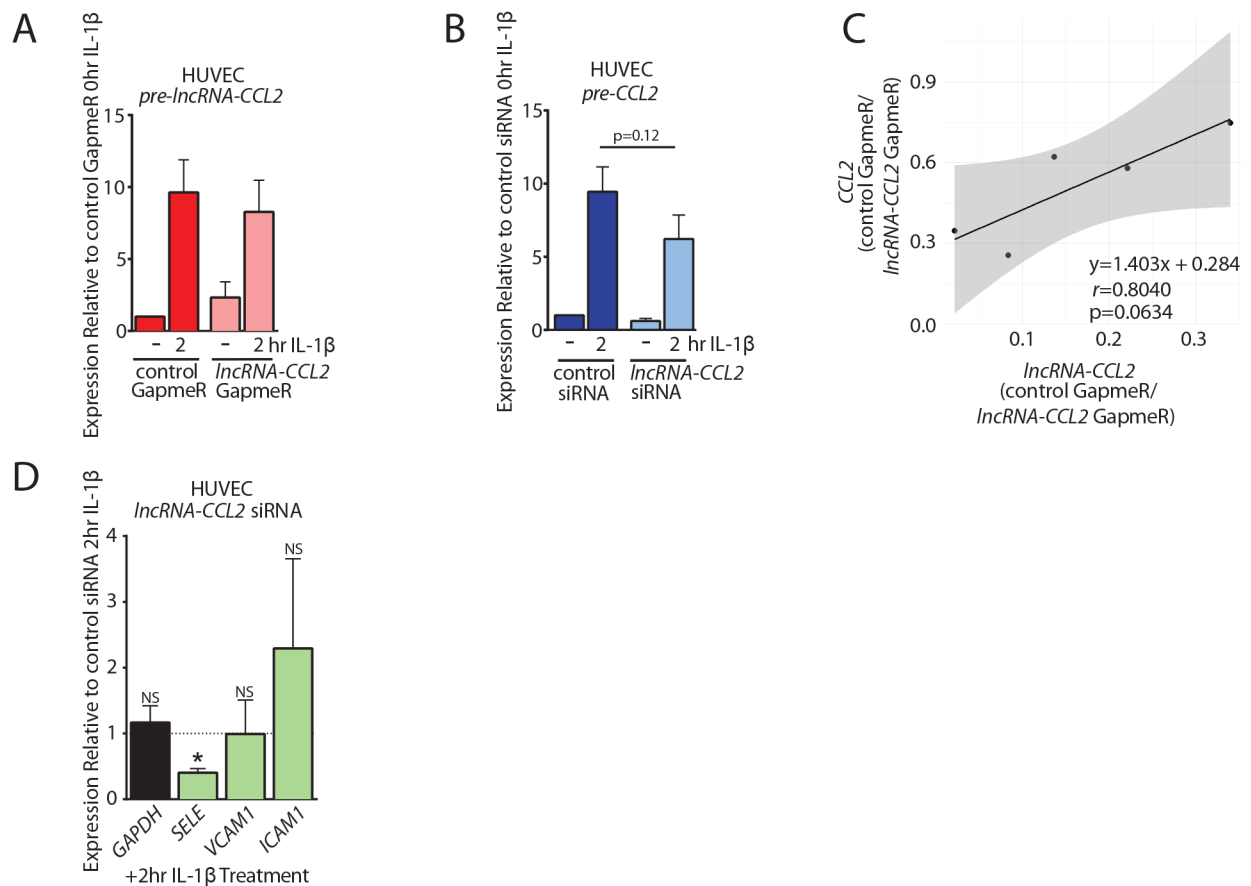

**Supplementary Figure 8. *IncRNA-CCL2* positively regulates levels of its neighboring *CCL2* gene.** A) qRT-PCR data of *pre-IncRNA-CCL2* (qRT-PCR primers targeting intron 1) levels upon knockdown of *IncRNA-CCL2* using GapmeR under basal condition and upon stimulation with IL-1 $\beta$  for 2 hours in HUVEC. Paired student t-test, n=3. B) qRT-PCR data of *pre-CCL2* gene expression upon knockdown of *IncRNA-CCL2* using siRNA under basal condition and upon stimulation with IL-1 $\beta$  for 2 hours in HUVEC. Paired student t-test, n=4. There was a trend towards decreased *pre-CCL2* expression. C) Scatterplot showing the degree of *IncRNA-CCL2* knockdown using GapmeR in HMEC1 on the x-axis and decrease in *CCL2* mRNA on the y-axis. Line of best fit is added to show the positive linear relationship. The pearson correlation coefficient ( $r$ ) and its associated p-value are shown. D) qRT-PCR data of inflammatory genes

upon knockdown of *lncRNA-CCL2* using siRNA and stimulation with IL-1 $\beta$  for 2 hours in HUVEC. \*p<0.05, paired student t-test, n=3, NS=non-significant.

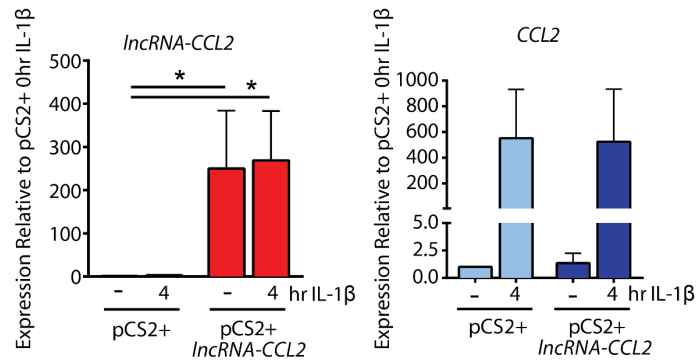

**Supplementary Figure 9. *IncRNA-CCL2* overexpression does not result in change in *CCL2* levels.** qRT-PCR data showing expression of *IncRNA-CCL2* and *CCL2* upon overexpression of spliced *IncRNA-CCL2* under basal conditions or upon 4 hours of IL-1 $\beta$  stimulation. \* $p < 0.05$ , paired student t-test,  $n=3$ .

A

| Result for species name : hg19 with job ID :1549419365 |               |          |          |              |                 |                    |              |
|--------------------------------------------------------|---------------|----------|----------|--------------|-----------------|--------------------|--------------|
| Data ID                                                | Sequence Name | RNA Size | ORF Size | Ficket Score | Hexamer Score   | Coding Probability | Coding Label |
| 0                                                      | LNCRNA_CCL2   | 341      | 87       | 0.7137       | -0.176729382124 | 0.0022346814191944 | no           |

B

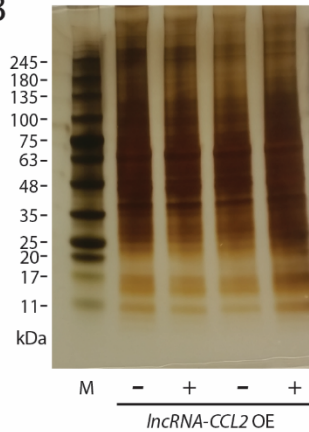

**Supplementary Figure 10. *lncRNA-CCL2* does not appear to encode for a protein. A)**

Screenshot of the results of the CPAT (Coding-Potential Assessment Tool) program showing that *lncRNA-CCL2* is not predicted to encode for a protein. B) Silver stained SDS-PAGE gel showing total protein in HUVECs that either did or did not have *lncRNA-CCL2* overexpressed. M= protein ladder marker. No major changes in proteins were noted.

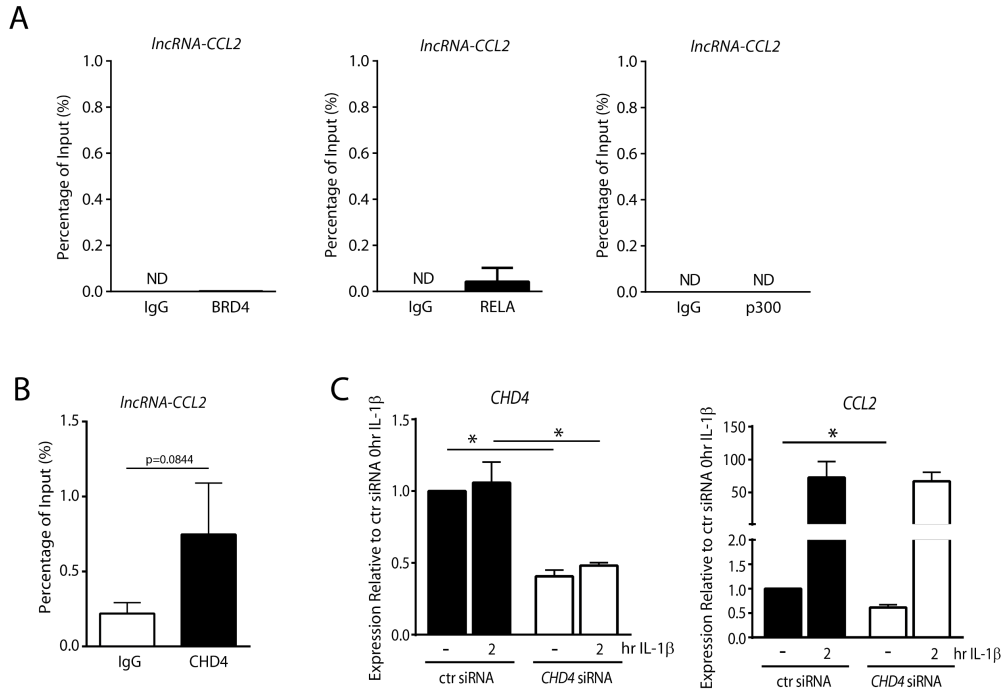

**Supplementary Figure 11. *IncRNA-CCL2* regulation of *CCL2* levels is not due to interaction with chromatin machinery.** A) Immunoprecipitation of BRD4, RELA, p300 or IgG control and detection of *IncRNA-CCL2* levels using qRT-PCR. ND = not detected. n=1, 2, and 2, respectively. B) Immunoprecipitation of CHD4 and detection of *IncRNA-CCL2* levels using qRT-PCR. Paired student t-test, n=3. C) qRT-PCR data of *CHD4*, *IncRNA-CCL2*, and *CCL2* expression upon knockdown of *CHD4* using siRNA under basal and 2-hour IL-1 $\beta$  stimulated conditions in HMEC1. \*p<0.05, paired student t-test, n=3.

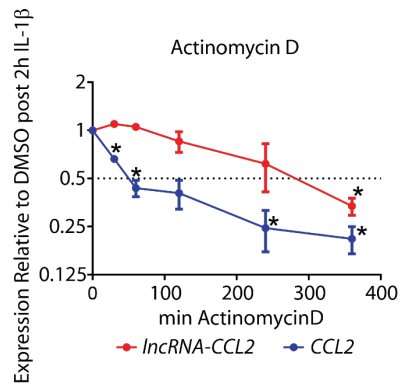

**Supplementary Figure 12. *IncRNA-CCL2* and *CCL2* transcripts differ in their half-lives.**

qRT-PCR data of *IncRNA-CCL2* and *CCL2* expression upon 2-hour IL-1 $\beta$  stimulation of HUVECs followed by Actinomycin D treatment for 0, 30, 60, 120, 240, or 360 minutes. Values are plotted as relative to DMSO treatment for equal length of time. \* $p < 0.05$ , One way ANOVA with Dunnet multiple comparisons test, relative to 0 minutes Actinomycin D treatment,  $n=3$ .

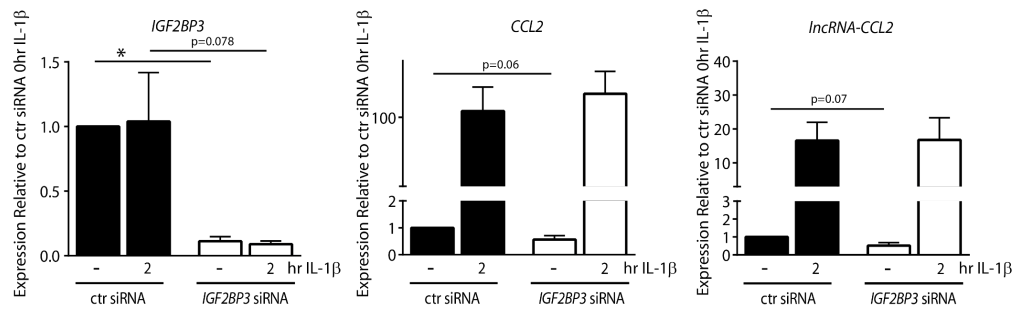

**Supplementary Figure 13. *IGF2BP3* knockdown does not result in changes in *CCL2* levels.**

qRT-PCR data of *IGF2BP3*, *CCL2*, and *lncRNA-CCL2* expression upon knockdown of *IGF2BP3* using siRNA under basal and 2-hour IL-1 $\beta$  stimulated conditions in HMEC1. \*p<0.05, paired student t-test, n=4.

## **Supplementary Tables**

Table S1. siRNA and GapmeR Sequences

| <b><u>Target</u></b> | <b><u>siRNA or<br/>GapmeR</u></b> | <b><u>ID#</u></b> | <b><u>Sequence (5'--&gt;3')</u></b> | <b><u>Concentration</u></b> |
|----------------------|-----------------------------------|-------------------|-------------------------------------|-----------------------------|
| <i>lncRNA-CCL2</i>   | siRNA                             | s500816           | GGCAAAGCCACAUGGAUUAtt               | 20 nM                       |
| <i>lncRNA-CCL2</i>   | GapmeR                            | 300601-00         | AGTTACTGAAGTGGCG                    | 30 nM                       |
| <i>CHD4</i>          | siRNA                             | S2985             | CACUCGAAAUUUUGAAGCAtt               | 60 nM                       |
| <i>HNRNPU</i>        | siRNA                             | S6743             | CUACCUGGGUUACUAAACAtt               | 20 nM                       |
| <i>IGF2BP2</i>       | siRNA                             | s20924            | GAACUUAACCAGUGCAGAAtt               | 20 nM                       |
| <i>IGF2BP3</i>       | siRNA                             | s20920            | CUUUGUUAGUCCUAAAGAATT               | 20 nM                       |



Table S2. Cloning primers and sequences of *lncRNA-CCL2* and scrambled control

|                                                                  |                                                                                                                                                                                                                                                                                                                                                                                                |
|------------------------------------------------------------------|------------------------------------------------------------------------------------------------------------------------------------------------------------------------------------------------------------------------------------------------------------------------------------------------------------------------------------------------------------------------------------------------|
| <p><i>lncRNA-CCL2</i></p>                                        | 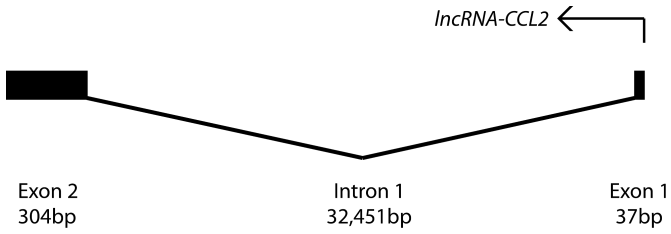 <p style="text-align: center;"> <span style="margin-right: 100px;">Exon 2<br/>304bp</span> <span style="margin-right: 100px;">Intron 1<br/>32,451bp</span> <span>Exon 1<br/>37bp</span> </p>                                                                                                                |
| <p><i>lncRNA-CCL2</i><br/>Exon1<br/>chr17:32578892-32578928</p>  | <p>Cctgtttctctgatggggagactgaggccatgaacag</p>                                                                                                                                                                                                                                                                                                                                                   |
| <p><i>lncRNA-CCL2</i><br/>Exon2<br/>chr17:32546137-32546440</p>  | <p>Atgaagaacagacttaaagaaggaagtgacttggcaaagccacatggattaaagggttga<br/>Agccaagaacaaaagcttggaaagtcaaggagtctgctccctcactgtattgggttctctatcta<br/>Caagcagaggagcctgaagaaggaatgagttgattggaaagtaatatgttccctgttattgaagg<br/>Tgaccactgtcaatgattccatggaaaagactcaagaaaaacaaattggtagatcttggagtta<br/>ggatcttagactctaaaatcatagccacttcagtaactcattg</p>                                                           |
| <p><i>lncRNA-CCL2</i><br/>Forward Cloning<br/>Primer - BamHI</p> | <p>CATGGATCCTGTTTCTCTGATGGG<br/>BamHI<br/>Site</p>                                                                                                                                                                                                                                                                                                                                             |
| <p><i>lncRNA-CCL2</i><br/>Reverse Cloning<br/>Primer - XbaI</p>  | <p>CATTCTAGACAATGAGTTACTGAAG<br/>XbaI<br/>Site</p>                                                                                                                                                                                                                                                                                                                                             |
| <p><i>lncRNA-CCL2</i></p>                                        | <p>cctgtttctctgatggggagactgaggccatgaacagatgaagaaacagacttaaagaag<br/>ggaagtgacttggcaaagccacatggattaaagggttgaagccaagaacaaaagcttgg<br/>aagtcagaggagtctgctccctcactgtattgggttctctatctacaagcagaggagcc<br/>tgaagaaggaatgagttgattggaaagtaatatgttccctgttattgaagtgaccacct<br/>gtcaatgattccatggaaaagactcaagaaaaacaaattggtagatcttggagttagga<br/>tcttagactctaaaatcatagccacttcagtaactcattg</p>               |
| <p><i>Scrambled lncRNA</i></p>                                   | <p>Ttatattctagacaatgagttactgaagtggcgtatgatttagagtctaagatcctaac<br/>tcaaagatctaccaattgttttcttgagtctttccatggaatcattgacaggtggt<br/>cacctcaataacaggaacatattactttccaatcaactcattccttctcaggctcct<br/>ctgctttagatagagaaccaatacagtgaggaggagcagactcctctgacttccaagct<br/>ttgttcttggttcaacccttttaacatcatgtggctttccgctctcgacaatttcttt<br/>aagtctgttcttcatctgttcatggcctcagtcctcccatcagagaaacaggggatcctat</p> |

Table S3. mRNA validation primers

| <b>mRNA Name</b> | <b>mRNA Symbol</b> | <b>Primer F</b>          | <b>Primer R</b>          |
|------------------|--------------------|--------------------------|--------------------------|
| <i>OSGIN2</i>    | NM_001126111       | TGGAAGTTGGATGGAACCTACCTG | TTTCCTCTGGCATAACTCGATCC  |
| <i>NR2F2</i>     | NM_001145155       | ACATACGGATCTTCCAAGAGCAA  | CTTTTCCTGCAAGCTTTCCACAT  |
| <i>MEIS2</i>     | NM_170675          | GACACATCCAGGAGTTTATTGGA  | GAGGGTCTCCGTACATGGAA     |
| <i>BARD1</i>     | NM_000465          | TTGCTGCTACCAGAGAAGAATG   | GTACAAGAGGTCCATCCCTACG   |
| <i>TNFAIP6</i>   | NM_007115          | CAATAGGAGTGAAAGATGGGATG  | GTGCCAGTAGCAGATTTGGTTAT  |
| <i>IER5L</i>     | NM_203434          | ATACCCTACCCCTTCGGACTT    | TCACCACGTGAGTGTCTAGGTC   |
| <i>CLEC14A</i>   | NM_175060          | TTGGGGAAGCCAGCTGTA       | GCTCCCAACTTGATCTGTC      |
| <i>F3</i>        | NM_001178096       | AGTTCACACCTTACCTGGAGACA  | GGCTTAGGAAAGTGTGTTCCCTT  |
| <i>CAV2</i>      | NM_001206747       | ATGTACAAGTTCCTGACGGTGTT  | CAGAACCATTAGGCAGGTCTTTA  |
| <i>IL15</i>      | NM_000585          | GAGTCCGGAGATGCAAGTATTC   | GCATCCAGATTCTGTTACATTCC  |
| <i>HES1</i>      | NM_005524          | GACATTCTGGAAATGACAGTGAAG | GTCACCTCGTTCATGCACTC     |
| <i>MESDC1</i>    | NM_022566          | ATCTCAGGCTTTAAGGGAGAGG   | TATAAATGGAGAGGGGCAGAGA   |
| <i>DACH1</i>     | ENST00000313174    | GAGACCCTCTACAATGACTGCAC  | GAATTATCCCAGGAGACATGAGA  |
| <i>C8orf4</i>    | NM_020130          | GAAACTCTGGAGACAAGAAAGCA  | CTCCTCCACATCTTGATCTATGG  |
| <i>SLC2A1</i>    | NM_006516          | AATGCTGATGATGAACCTGCT    | AGGATCAGCATCTCAAAGGACT   |
| <i>RIPK2</i>     | NM_003821          | GAAGCACCTGCACATCCAC      | AGGCTCATTGCAAATTCCCA     |
| <i>SMAD3</i>     | NM_001145104       | ATGTCAACAGGAATGCAGCAGTGG | ATAGCGCTGGTTACAGTTGGGAGA |
| <i>CCL2</i>      | NM_002982          | GCTCAGCCAGATGCAATCAA     | TTCTTTGGGACACTTGCTGC     |
| <i>CCL7</i>      | NM_006273          | CAGAGGCTGGAGAGCTACAG     | GATTACAGCTTCCCAGGGGAC    |
| <i>CCL11</i>     | NM_002986          | TCCAACATGAAGGTCTCCGC     | TCTTAGTCGCTGAAGGGGT      |
| <i>CCL8</i>      | NM_005623          | TGGAGAGCTACACAAGAATCACC  | TGGTCCAGATGCTTCATGGAA    |
| <i>CCL13</i>     | ENST00000225844    | CTTGCAGAGGCTGAAGAGCT     | GATGACAGCCTTCTGGGGAC     |

Table S4. lncRNA validation primers.

| <b>lncRNA Name</b>                            | <b>lncRNA Symbol</b> | <b>Primer F</b>          | <b>Primer R</b>         |
|-----------------------------------------------|----------------------|--------------------------|-------------------------|
| <i>lncRNA-OSGIN2/RIPK2</i>                    | ENST00000523859      | CCTTGAGAGAGTCCATCCATCTA  | GAGGCAGAAGAATTGCTTGAA   |
| <i>lncRNA-NR2F2</i>                           | ENST00000560010      | GTTGGACCGTACTCGGATCT     | CTTGTGAAGATGTTGCATACAGG |
| <i>lncRNA-NR2F2-2</i>                         | ENST00000561402      | GAGGTGAAACAACACTGGGTTATG | TCTGAACATGATGCCAAACAC   |
| <i>lncRNA-BARD1</i>                           | TCONS_00004010       | GTTTTGACTGCTGTTGGACTTG   | GGCAGCTAATTACGCTTCAGTAT |
| <i>lncRNA-SMAD3</i>                           | ENST00000558436      | CCATCATGACTGCTATTGGAAA   | AATCCCACCTCTAGGAAACTCC  |
| <i>lncRNA-IER5L</i>                           | uc010myu.1           | CGTCTGGCTCTCCAACACTAGACT | CAGTGGCTACATCCACTCTCTG  |
| <i>lncRNA-CLEC14A</i>                         | ENST00000555636      | AGGAAAAGAATGCAGACACCTC   | GAAGTTGCCATATGAATGCTACC |
| <i>lncRNA-F3</i>                              | TCONS_00001037       | CAGCTTAGGTCTGAGGGTCAGT   | CCTCAGTCACTATCTCTGGTCGT |
| <i>lncRNA-CAV2</i>                            | ENST00000439070      | CAAATGGCACTCATTAAGGACA   | GTGCTGCTCTCAGTAGCAAGTTA |
| <i>lncRNA-IL15</i>                            | ENST00000509161      | AGAGGAGAAAAGTGGCAGACAG   | GTCCATGAGGTAGATGCAATCA  |
| <i>lncRNA-HES1</i>                            | NR_033944            | TGGGGAGAACTTATAAGAGTTTGG | CCCCTTCTCCTCTTTTTTCATTT |
| <i>lncRNA-HES1-2</i>                          | ENST00000418353      | GAGGGCTATTGAACGAGCTTT    | CTGGAATGTGCTGTTTCTGG    |
| <i>lncRNA-MESDC1</i>                          | ENST00000563737      | TGAATCACTTAGAGGTGGGGTTA  | CAGATGTGAAAGATTGTGTGCTC |
| <i>lncRNA-DACH1</i>                           | uc.353+              | GAGGACAAGTTTGGTAGACCTGA  | GCATCCAGGTTATTGTTTCATTG |
| <i>lncRNA-C8orf4</i>                          | TCONS_00014982       | TAGGCTATGTGAACCGTCACTG   | TCAGGGGAGAGTAAAGACAAGC  |
| <i>lncRNA-CCL2/<br/>CCL7/ CCL8/<br/>CCL13</i> | TCONS_00025610       | GGGAGACTGAGGCCATGAAC     | GCTTTGCCAAGTCACTTCCC    |

Table S5. qPCR primers

| <b>Transcript Name</b>                 | <b>Transcript Symbol</b> | <b>Primer F</b>           | <b>Primer R</b>          |
|----------------------------------------|--------------------------|---------------------------|--------------------------|
| <i>TBP</i>                             | NM_003194                | TCGGAGAGTTCTGGGATTGT      | CACGAAGTGCAATGGTCTTT     |
| <i>GAPDH</i>                           | NM_002046                | AGGTGAAGGTCGGAGTCAAC      | GAGGTCAATGAAGGGGTCAT     |
| <i>CCL2</i>                            | NM_002982                | GCTCAGCCAGATGCAATCAA      | TTCTTTGGGACACTTGCTGC     |
| <i>CCL7</i>                            | NM_006273                | CAGAGGCTGGAGAGCTACAG      | GATTACAGCTTCCCGGGAC      |
| <i>CCL11</i>                           | NM_002986                | TCCAACATGAAGGTCTCCGC      | TCTCTAGTCGCTGAAGGGGT     |
| <i>CCL8</i>                            | NM_005623                | TGGAGAGCTACACAAGAATCACC   | TGGTCCAGATGCTTCATGGAA    |
| <i>CCL13</i>                           | NM_005408                | CTTGCGAGAGGCTGAAGAGCT     | GATGACAGCCTTCTGGGGAC     |
| <i>CCL1</i>                            | NM_002981                | ATACCAGCTCCATCTGCTCC      | TTCTGTGCCTCTGAACCCAT     |
| <i>SELE</i>                            | NM_000450                | GAACCAAAGACTCGGGCATGT     | ATGACCACTGCAGGATGCATT    |
| <i>VCAM1</i>                           | NM_001078                | GTTGAAGGATGCGGGAGTAT      | GGATGCAAATAGAGCACGA      |
| <i>ICAM1</i>                           | NM_000201                | CGGCCAGCTTATACACAAGA      | GTCTGCTGGGAATTTTCTGG     |
| <i>lncRNA-CCL2</i><br>(exon 1- exon 2) | TCONS_00025610           | GGGAGACTGAGGCCATGAAC      | GCTTTGCCAAGTCACTTCCC     |
| <i>pre-lncRNA-CCL2</i><br>(intron 1)   | TCONS_00025610           | GGTCTTTACAACAGCCTGCC      | TATGTGGCCCTGGTCAAAGT     |
| <i>pre-CCL2</i><br>(intron 1)          | NM_002982                | TGAACCCCAAATCCAGTCC       | GGAGTAACTGCGCTGAGTGT     |
| <i>CHD4</i>                            | NM_001297553             | GGAGCCTAAATCATCTGCTCAG    | GTGAGGGTTTCGATAATCCTCCT  |
| <i>HNRNPU</i>                          | NM_004501                | GAGCATCCTATGGTGTGTCAA     | TGACCAGCCAATACGAACTTC    |
| <i>IGF2BP2</i>                         | NM_001007225             | AGAACTTAACCAGTGCAGAAGTCAT | CCTGTTGTACAATTTCCCTGATCT |
| <i>IGF2BP3</i>                         | NM_006547                | AATAACTGGTCACTTCTATGCTTGC | GCTGCTTTACCTGAGTCAGAATTT |
| <i>MT-CO2</i>                          | YP_003024029             | ACGCATCCTTTACATAACAGAC    | GCCAATTGATTTGATGGTAAGG   |
| <i>MALAT1</i>                          | NR_002819                | GTGATGCGAGTTGTTCTCCG      | CTGGCTGCCTCAATGCCTAC     |

Table S6. ChIP-seq Quality Control Metrics for GEO: GSE89970 (1).

| <b>GEO Dataset</b> | <b>Name</b>                        | <b># Raw Reads</b> | <b># Mapped Reads</b> | <b>% Mapped Reads</b> |
|--------------------|------------------------------------|--------------------|-----------------------|-----------------------|
| GSM2394419         | HAEC.ChIP.p65.control.4h.rep1      | 21152400           | 20606203              | 97.42                 |
| GSM2394420         | HAEC.ChIP.p65.control.4h.rep2      | 28442645           | 27682692              | 97.33                 |
| GSM2394421         | HAEC.ChIP.p65.IL1b.4h.rep1         | 26751263           | 25743447              | 96.23                 |
| GSM2394422         | HAEC.ChIP.p65.IL1b.4h.rep2         | 38346553           | 37207429              | 97.03                 |
| GSM2394402         | HAEC.ChIP.H3K27ac.control.4h.rep1  | 29804176           | 29420670              | 98.71                 |
| GSM2394403         | HAEC.ChIP.H3K27ac.control.4h.rep2  | 22993877           | 22761469              | 98.99                 |
| GSM2394404         | HAEC.ChIP.H3K27ac.IL1b.4h.rep1     | 20663461           | 20318255              | 98.33                 |
| GSM2394405         | HAEC.ChIP.H3K27ac.IL1b.4h.rep2     | 31291354           | 31043431              | 99.21                 |
| GSM2394425         | HAEC.input.control.4h.DSG          | 22962769           | 22535711              | 98.14                 |
| GSM2394426         | HAEC.input.control.4h.formaldehyde | 13642816           | 13407807              | 98.28                 |
| GSM2394427         | HAEC.input.IL1b.4h.DSG             | 32367536           | 31768065              | 98.15                 |
| GSM2394428         | HAEC.input.IL1b.4h.formaldehyde    | 19810556           | 19455987              | 98.21                 |

| <b>GEO Dataset</b> | <b># Uniquely Mapped Reads</b> | <b>% Uniquely Mapped Reads</b> | <b># of Peaks</b> | <b>PBC</b> | <b>NRF (Library Size Adjusted)</b> | <b>NSC</b> | <b>RSC</b> |
|--------------------|--------------------------------|--------------------------------|-------------------|------------|------------------------------------|------------|------------|
| GSM2394419         | 15787670                       | 74.64                          | 3594              | 0.54       | 0.725                              | 1.171      | 1.163      |
| GSM2394420         | 21174704                       | 74.45                          | 31866             | 0.699      | 0.863                              | 1.276      | 1.357      |
| GSM2394421         | 20623464                       | 77.09                          | 53766             | 0.273      | 0.55                               | 2.114      | 1.943      |
| GSM2394422         | 28621202                       | 74.64                          | 53548             | 0.397      | 0.731                              | 1.606      | 1.787      |
| GSM2394402         | 24317915                       | 81.59                          | 68514             | 0.361      | 0.681                              | 1.719      | 1.563      |
| GSM2394403         | 18712945                       | 81.38                          | 55165             | 0.895      | 0.886                              | 1.974      | 1.337      |
| GSM2394404         | 16354165                       | 79.15                          | 33847             | 0.213      | 0.326                              | 1.792      | 1.292      |
| GSM2394405         | 26467892                       | 84.59                          | 74091             | 0.835      | 0.924                              | 2.486      | 1.367      |
| GSM2394425         | 16800910                       | 73.17                          | NA                | 0.95       | 0.952                              | 1.029      | 0.321      |
| GSM2394426         | 10186183                       | 74.66                          | NA                | 0.903      | 0.91                               | 1.08       | 0.515      |
| GSM2394427         | 23501019                       | 72.61                          | NA                | 0.961      | 0.963                              | 1.018      | 0.295      |
| GSM2394428         | 14951618                       | 75.47                          | NA                | 0.937      | 0.951                              | 1.041      | 0.486      |

## **Supplementary Datasets**

### Dataset S1- Arraystar Microarray Results

- Sheet 1- Raw Data- lncRNA microarray
- Sheet 2- Raw Data- mRNA microarray
- Sheet 3- lncRNA microarray results
- Sheet 4- mRNA microarray results

### Dataset S2- Differentially Expressed mRNAs and lncRNAs

- Sheet 1- lncRNA- IL1B de (differentially expressed) 4 hr
- Sheet 2- mRNA- IL1B de (differentially expressed) 4 hr
- Sheet 3- lncRNA- IL1B de (differentially expressed) 24 hr
- Sheet 4- mRNA- IL1B de (differentially expressed) 24 hr

### Dataset S3- Neighboring mRNA<sup>de</sup>-lncRNA<sup>de</sup> and mRNA<sup>de</sup>-mRNA<sup>de</sup>

- Sheet 1- 50kbp mRNA<sup>de</sup>-lncRNA<sup>de</sup>
- Sheet 2- 150kbp mRNA<sup>de</sup>-lncRNA<sup>de</sup>
- Sheet 3- 300kbp mRNA<sup>de</sup>-lncRNA<sup>de</sup>
- Sheet 4- 50kbp mRNA<sup>de</sup>-mRNA<sup>de</sup>
- Sheet 5- 150kbp mRNA<sup>de</sup>-mRNA<sup>de</sup>
- Sheet 6- 300kbp mRNA<sup>de</sup>-mRNA<sup>de</sup>
- Sheet 7- pairs tabulation

### Dataset S4- Spearman Correlation

- Sheet 1- Genomic distance correlation
- Sheet 2- TAD correlation

### Dataset S5- Transcriptional Orientation Classification

- Sheet 1- mRNA<sup>de</sup>-lncRNA<sup>de</sup> classification
- Sheet 2- mRNA<sup>de</sup>-mRNA<sup>de</sup> classification
- Sheet 3- all classifications (mRNA<sup>de</sup>-lncRNA<sup>de</sup>) correlation
- Sheet 4- divergent (mRNA<sup>de</sup>-lncRNA<sup>de</sup>) correlation

### Dataset S6- Same TAD Divergent mRNA<sup>de</sup>-lncRNA<sup>de</sup> Pairs

- Sheet 1- Top mRNA<sup>de</sup>-lncRNA<sup>de</sup> pairs
- Sheet 2- lncRNA info
- Sheet 3- mRNA info

### Dataset S7- *lncRNA-CCL2* RNA-IP Mass Spectrometry Results

## **Citations:**

1. Hogan NT, *et al.* (2017) Transcriptional networks specifying homeostatic and inflammatory programs of gene expression in human aortic endothelial cells. *eLife* 6.
2. Blankenberg D, *et al.* (2010) Manipulation of FASTQ data with Galaxy. *Bioinformatics* 26(14):1783-1785.
3. Langmead B & Salzberg SL (2012) Fast gapped-read alignment with Bowtie 2. *Nature Methods* 9(4):357.
4. Feng J, Liu T, Qin B, Zhang Y, & Liu X (2012) Identifying ChIP-seq enrichment using MACS. *Nature Protocols* 7(9):1728.
5. Barnett DW, Garrison EK, Quinlan AR, Strömberg MP, & Marth GT (2011) BamTools: a C++ API and toolkit for analyzing and managing BAM files. *Bioinformatics* 27(12):1691-1692.
6. Ramírez F, *et al.* (2016) deepTools2: a next generation web server for deep-sequencing data analysis. *Nucleic Acids Research* 44(W1).
7. Zhang Y, *et al.* (2016) Characterization of Long Noncoding RNA-Associated Proteins by RNA-Immunoprecipitation. *Methods in molecular biology (Clifton, N.J.)* 1402:19-26.
8. Naylor AR, Rothwell PM, & Bell PRF (2003) Overview of the principal results and secondary analyses from the European and North American randomised trials of endarterectomy for symptomatic carotid stenosis. *European Journal of Vascular and Endovascular Surgery* 26(2):115-129.
9. Perisic L, *et al.* (2016) Gene expression signatures, pathways and networks in carotid atherosclerosis. *Journal of Internal Medicine* 279(3):293-308.
